# Supplementary material for: Overview and statistical analysis of boundary layer clouds and precipitation over the western North-Atlantic Ocean
Source: Copernicus journal article supplement (doi:10.5194/egusphere-2023-898), 2023-05-11
Supplement: Supplementary file 1 [file egusphere-2023-898-supplement.pdf]

# Overview and statistical analysis of boundary layer clouds and precipitation over the western North-Atlantic Ocean

Simon Kirschler<sup>1,2</sup>, Christiane Voigt<sup>1,2</sup>, Bruce E. Anderson<sup>3</sup>, Gao Chen<sup>3</sup>, Ewan C. Crosbie<sup>3</sup>, Richard A. Ferrare<sup>3</sup>, Valerian Hahn<sup>1,2</sup>, Johnathan W. Hair<sup>3</sup>, Stefan Kaufmann<sup>1,2</sup>, Richard H. Moore<sup>3</sup>, David Painemal<sup>3</sup>, Claire E. Robinson<sup>3</sup>, Kevin J. Sanchez<sup>3</sup>, Amy J. Scarino<sup>3</sup>, Taylor J. Shingler<sup>3</sup>, Michael A. Shook<sup>3</sup>, Kenneth L. Thornhill<sup>3</sup>, Edward L. Winstead<sup>3</sup>, Luke D. Ziemba<sup>3</sup>, and Armin Sorooshian<sup>4,5</sup>

<sup>1</sup>Institut für Physik der Atmosphäre, Deutsches Zentrum für Luft- und Raumfahrt (DLR), Oberpfaffenhofen, Germany

<sup>2</sup>Institut für Physik der Atmosphäre, Johannes Gutenberg-Universität, Mainz, Germany

<sup>3</sup>NASA Langley Research Center, Hampton, VA, USA

<sup>4</sup>Department of Chemical and Environmental Engineering, University of Arizona, Tucson, Arizona, USA

<sup>5</sup>Department of Hydrology and Atmospheric Sciences, University of Arizona, Tucson, Arizona, USA

**Correspondence:** Kirschler Simon (Simon.Kirschler@dlr.de)

ACTIVATE All Summers

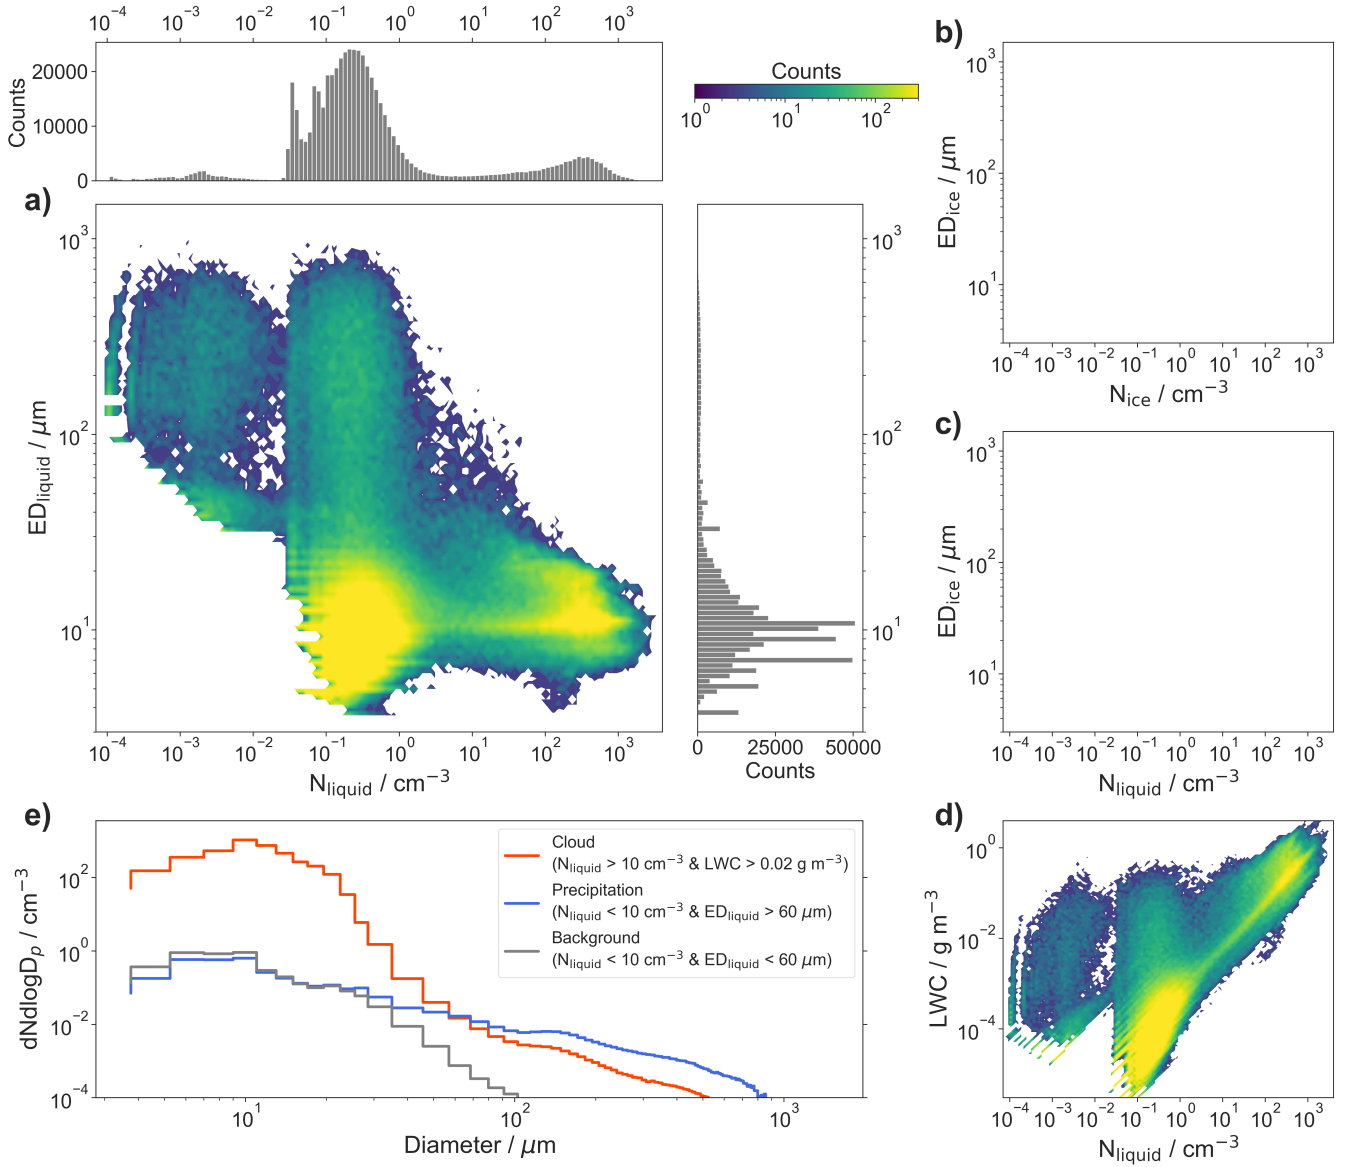

**Figure S 1.** Occurrence frequency of cloud properties in parameter phase space of  $ED_{\text{liquid}}$  and  $N_{\text{liquid}}$  (a) and parameter phase space of  $ED_{\text{ice}}$  and  $N_{\text{ice}}$  (b),  $ED_{\text{ice}}$  and  $N_{\text{liquid}}$  (c) and  $LWC$  and  $N_{\text{liquid}}$  (d). The color code shows the number of seconds of cloud data and is the same for all shown phase spaces. Mean particle size distribution of the cloud, precipitation, and background region (e). All subplots relate to all summer deployments.

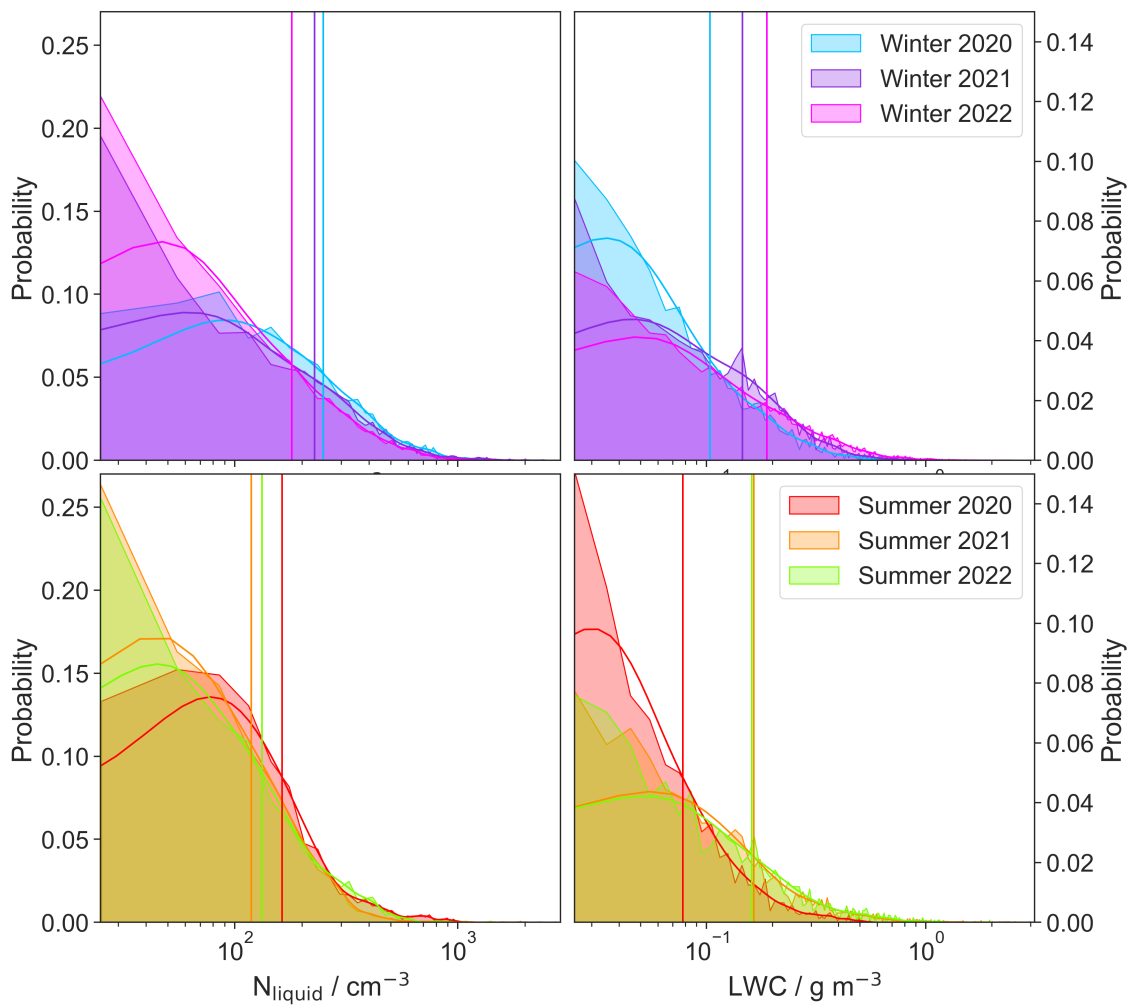

**Figure S 2.** Probability distribution of  $N_{\text{liquid}}$  and LWC for all winter deployments in the upper panels and for all summer deployments in the lower panels with their mean values as vertical lines.

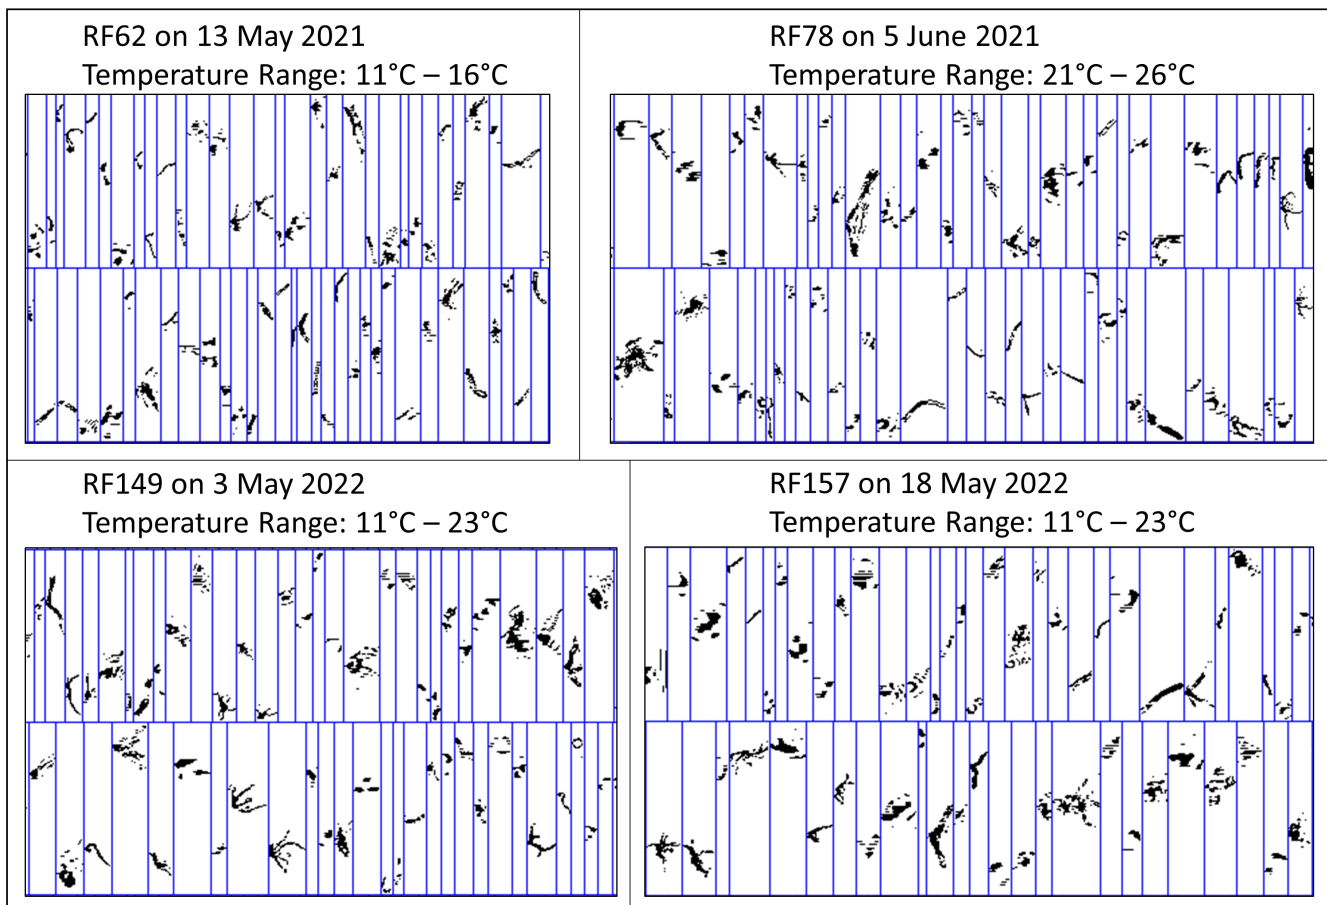

**Figure S 3.** Examples of scarce and large bioaerosol during early summer 2021 and 2022.
